# Supplementary material for: Dietary saccharides and sweet tastants have differential effects on colonization ofDrosophilaoocytes byWolbachiaendosymbionts
Source: Oxford University Press journal article supplement (doi:10.1242/bio.023895), 2017-01-01
Supplement: bio023895supp.pdf [file bio023895supp.pdf]

## Supplemental Tables

| Saccharide and sweet tastant properties |          |                    |                |
|-----------------------------------------|----------|--------------------|----------------|
| Molecule                                | calories | relative sweetness | glycemic index |
| Glucose                                 | 3.8      | 0.75               | 100            |
| Fructose                                | 3.6      | 1.7                | 19             |
| Galactose                               | 4.1      | 0.3                | n/d            |
| Sucrose                                 | 3.9      | 1                  | 68             |
| Lactose                                 | 3.9      | 0.15               | 46             |
| Maltose                                 | 4        | 0.3                | 105            |
| Trehalose                               | 4        | 0.45               | 72             |
| Lactulose                               | n/d      | n/d                | n/d            |
| Erythritol                              | 0.2      | 0.7                | 0              |
| Xylitol                                 | 2.4      | 1                  | 12             |
| Aspartame                               | 4        | 160-220            | 0              |
| Saccharin                               | 0        | 300-600            | 0              |
| References                              | [1-4]    | [1, 2, 5, 6]       | [2, 3]         |

**Table S1.** Sugar and sweet tastant properties as reported by mammalian studies.

| <i>D. melanogaster</i> sugar transporter information |                                      |                                |                 |
|------------------------------------------------------|--------------------------------------|--------------------------------|-----------------|
| Gene                                                 | Expression in adults of both genders | Expression level in gut tissue | Notes           |
| <i>CG10960</i>                                       | high                                 | moderate                       | -               |
| <i>CG1208</i>                                        | very low-moderate                    | moderate                       | -               |
| <i>CG1213</i>                                        | moderate-very high                   | high                           | -               |
| <i>CG14606</i>                                       | very low-low                         | moderate                       | -               |
| <i>CG15406</i>                                       | moderate-very high                   | high-very high                 | -               |
| <i>CG15408</i>                                       | low-moderate                         | moderate-moderately high       | -               |
| <i>CG31272</i>                                       | very low-low                         | moderately high                | -               |
| <i>CG3168</i>                                        | high-very high                       | very high                      | -               |
| <i>CG3285</i>                                        | low-moderate                         | moderate-moderately high       | -               |
| <i>CG33281</i>                                       | very low-low                         | moderate                       | -               |
| <i>CG4607</i>                                        | low-moderately high                  | high                           | -               |
| <i>CG6484</i>                                        | moderate-high                        | very high                      | -               |
| <i>CG8249</i>                                        | very low-low                         | very low-low                   | -               |
| <i>CG8837</i>                                        | very low-low                         | low-moderate                   | -               |
| <i>Slc45-1</i>                                       | low-moderately high                  | low-moderately high            | -               |
| <i>Treh</i>                                          | high                                 | high-very high                 | -               |
| <i>tret1-1</i>                                       | moderately high-very high            | moderate                       | -               |
| <i>CG31100</i>                                       | very low-low                         | very low                       | mainly fat body |
| <i>CG31103</i>                                       | very low-low                         | no                             | mainly head     |
| <i>CG4797</i>                                        | low                                  | very low                       | mainly head     |
| <i>GLUT1</i>                                         | low                                  | very low                       | mainly head     |
| <i>Slc45-2</i>                                       | very low                             | no                             | mainly head     |
| <i>CG14605</i>                                       | no                                   | no                             | mainly testis   |
| <i>CG14691</i>                                       | no                                   | no                             | mainly testis   |
| <i>Glut3</i>                                         | no                                   | no                             | mainly testis   |
| <i>sut4</i>                                          | no                                   | no                             | mainly testis   |
| <i>tret1-2</i>                                       | very low-moderate                    | no                             | mainly testis   |
| <i>CG33282</i>                                       | no                                   | low-moderate                   | males only      |

**Table S2.** Expression patterns of predicted sugar transporters in *D. melanogaster*, as indicated by publicly available data posted by the ModEncode project [7], available through Flybase.net [8].

| Content of nutrient-altered foods used in this study. |                   |                       |                           |
|-------------------------------------------------------|-------------------|-----------------------|---------------------------|
| Treatment classification                              | Treatment type    | Ingredient 1          | Ingredient 2              |
| Saccharide and yeast treatments                       | Control food      | 3.5mL control food    | 1.5mL DI water            |
|                                                       | Sucrose           | 3.5mL control food    | 1.5mL sucrose solution    |
|                                                       | Yeast             | 3.5 mL control food   | 1.5mL yeast paste         |
|                                                       | Galactose         | 3.5mL control food    | 1.5 mL galactose solution |
|                                                       | Lactose           | 3.5mL control food    | 1.5 mL lactose solution   |
|                                                       | Maltose           | 3.5mL control food    | 1.5 mL maltose solution   |
|                                                       | Trehalose         | 3.5mL control food    | 1.5 mL trehalose solution |
| Sweetener treatments                                  | Control           | 5 mL control food     | ---                       |
|                                                       | Aspartame         | 5 mL control food     | 1.47 g dry aspartame      |
|                                                       | Saccharine        | 5 mL control food     | 0.92 g dry saccharin      |
|                                                       | Erythritol        | 5 mL control food     | 0.61 g dry erythritol     |
|                                                       | Xylitol           | 5 mL control food     | 0.76 g dry xylitol        |
|                                                       | Lactulose         | 5 mL control food     | 1.71 g dry lactulose      |
| Dual yeast and sucrose treatment                      | Control food      | 3.5 mL control food   | 1.5 mL DI water           |
|                                                       | Yeast food        | 3.5 mL yeast enriched | 1.5 mL DI water           |
|                                                       | Sucrose food      | 3.5 mL control food   | 1.5 mL sucrose solution   |
|                                                       | Yeast + Sucrose   | 3.5 mL yeast enriched | 1.5 mL sucrose solution   |
|                                                       | Yeast + Maltose   | 3.5 mL yeast enriched | 1.5 mL maltose solution   |
|                                                       | Yeast + Trehalose | 3.5 mL yeast enriched | 1.5 mL trehalose solution |
|                                                       | Yeast + Lactose   | 3.5 mL yeast enriched | 1.5 mL lactose solution   |
|                                                       | Yeast + Galactose | 3.5 mL yeast enriched | 1.5 mL galactose solution |
| Dessication test                                      | Control           | 5 mL control food     | ---                       |
|                                                       | Silica gel        | 5 mL control food     | 2.5 g silica gel          |

**Table S3.** Content of dietary treatments used in this study.

## Supplemental References

1. Nikoleli, G. and D.P. Nilkolelis, *Low Calorie Nonnutritive Sweeteners*, in *Sweeteners Nutritional Aspects, Applications, and Production Technology*, T. Varzakas, A. Labropoulos, and S. Anestis, Editors. 2012, CRC: Boca Raton. p. 79-118.
2. Evrendilek, G.A., *Sugar Alcohols (Polyols)*, in *Sweeteners Nutritional Aspects, Applications, and Production Technology*, T. Varzakas, A. Labropoulos, and S. Anestis, Editors. 2012, CRC Press: Boca Raton. p. 45-78.
3. Service, S.U.G.I.R. *GI Testing and Research*. [cited 2016; Available from: <http://www.glycemicindex.com/index.php>.
4. FDA, *Additional Information about High-Intensity Sweeteners Permitted for use in Food in the United States*. 2015.
5. Tzia, C., et al., *Chemistry and Functional Properties of Carbohydrates and Sugars (Monosaccharides, Disaccharides, and Polysaccharides)*, in *Sweeteners Nutritional Aspects, Applications, and Production Technology*, T. Varzakas, A. Labropoulos, and S. Anestis, Editors. 2012, CRC Press: Boca Raton. p. 11-44.
6. Parrish, F.W., et al., *Sweetness of lactulose relative to sucrose*. *Food Science*, 1979. **44**(3): p. 813-815.
7. mod, E.C., et al., *Identification of functional elements and regulatory circuits by Drosophila modENCODE*. *Science*, 2010. **330**(6012): p. 1787-97.
8. McQuilton, P., et al., *FlyBase 101--the basics of navigating FlyBase*. *Nucleic Acids Res*, 2012. **40**(Database issue): p. D706-14.
